# Supplementary material
Source: MDPI journal article supplement (https://www.mdpi.com/2072-4292/14/12/2927)
Supplement: s1 [file s1]

**Table S1.** Seasonal calendar of UAV flights performed in the two locations according to the estimated phenological stages (vegetative growth and senescence).

| <b>UAV observation</b> | <b>Location</b> | <b>Stage</b>      |
|------------------------|-----------------|-------------------|
| 24/04/2020             | PAC 1           | Vegetative growth |
| 07/05/2020             | PAC 1           | Vegetative growth |
| 16/05/2020             | PAC 1           | Vegetative growth |
| 22/05/2020             | PAC 1           | Vegetative growth |
| 01/06/2020             | PAC 1           | Vegetative growth |
| 12/06/2020             | PAC 1           | Vegetative growth |
| 23/06/2020             | PAC 1           | Vegetative growth |
| 29/06/2020             | PAC 1           | Vegetative growth |
| 09/07/2020             | PAC 1           | Vegetative growth |
| 14/07/2020             | PAC 1           | Vegetative growth |
| 20/07/2020             | PAC 1           | Vegetative growth |
| 05/08/2020             | PAC 1           | Vegetative growth |
| 18/08/2020             | PAC 1           | Senescence        |
| 26/08/2020             | PAC 1           | Senescence        |
| 01/09/2020             | PAC 1           | Senescence        |
| 17/09/2020             | PAC 1           | Senescence        |
| 28/09/2020             | PAC 1           | Senescence        |
| 28/10/2020             | PAC 1           | Senescence        |
| 19/11/2020             | PAC 1           | Senescence        |
| 15/12/2020             | PAC 1           | Senescence        |
| 26/01/2021             | PAC 1           | Senescence        |
| 01/02/2021             | PAC 1           | Senescence        |
| 09/06/2020             | TWS 1           | Vegetative growth |
| 30/06/2020             | TWS 1           | Vegetative growth |
| 14/07/2020             | TWS 1           | Vegetative growth |
| 29/07/2020             | TWS 1           | Vegetative growth |
| 11/08/2020             | TWS 1           | Vegetative growth |
| 24/08/2020             | TWS 1           | Vegetative growth |
| 22/09/2020             | TWS 1           | Vegetative growth |
| 09/10/2020             | TWS 1           | Vegetative growth |
| 26/11/2020             | TWS 1           | Senescence        |
| 15/12/2020             | TWS 1           | Senescence        |
| 15/01/2021             | TWS 1           | Senescence        |
| 10/02/2021             | TWS 1           | Senescence        |
| 25/02/2021             | TWS 1           | Senescence        |
